# Supplementary material for: Expression and prognostic value of long non-coding RNA H19 in glioma via integrated bioinformatics analyses
Source: publisher site journal article supplement (doi:10.18632/aging.102819), 2020-02-20
Supplement: Supplementary file [file aging-v12i4-102819-supplementary-material-SD1.pdf]

SUPPLEMENTARY FIGURES

Supplementary Figures

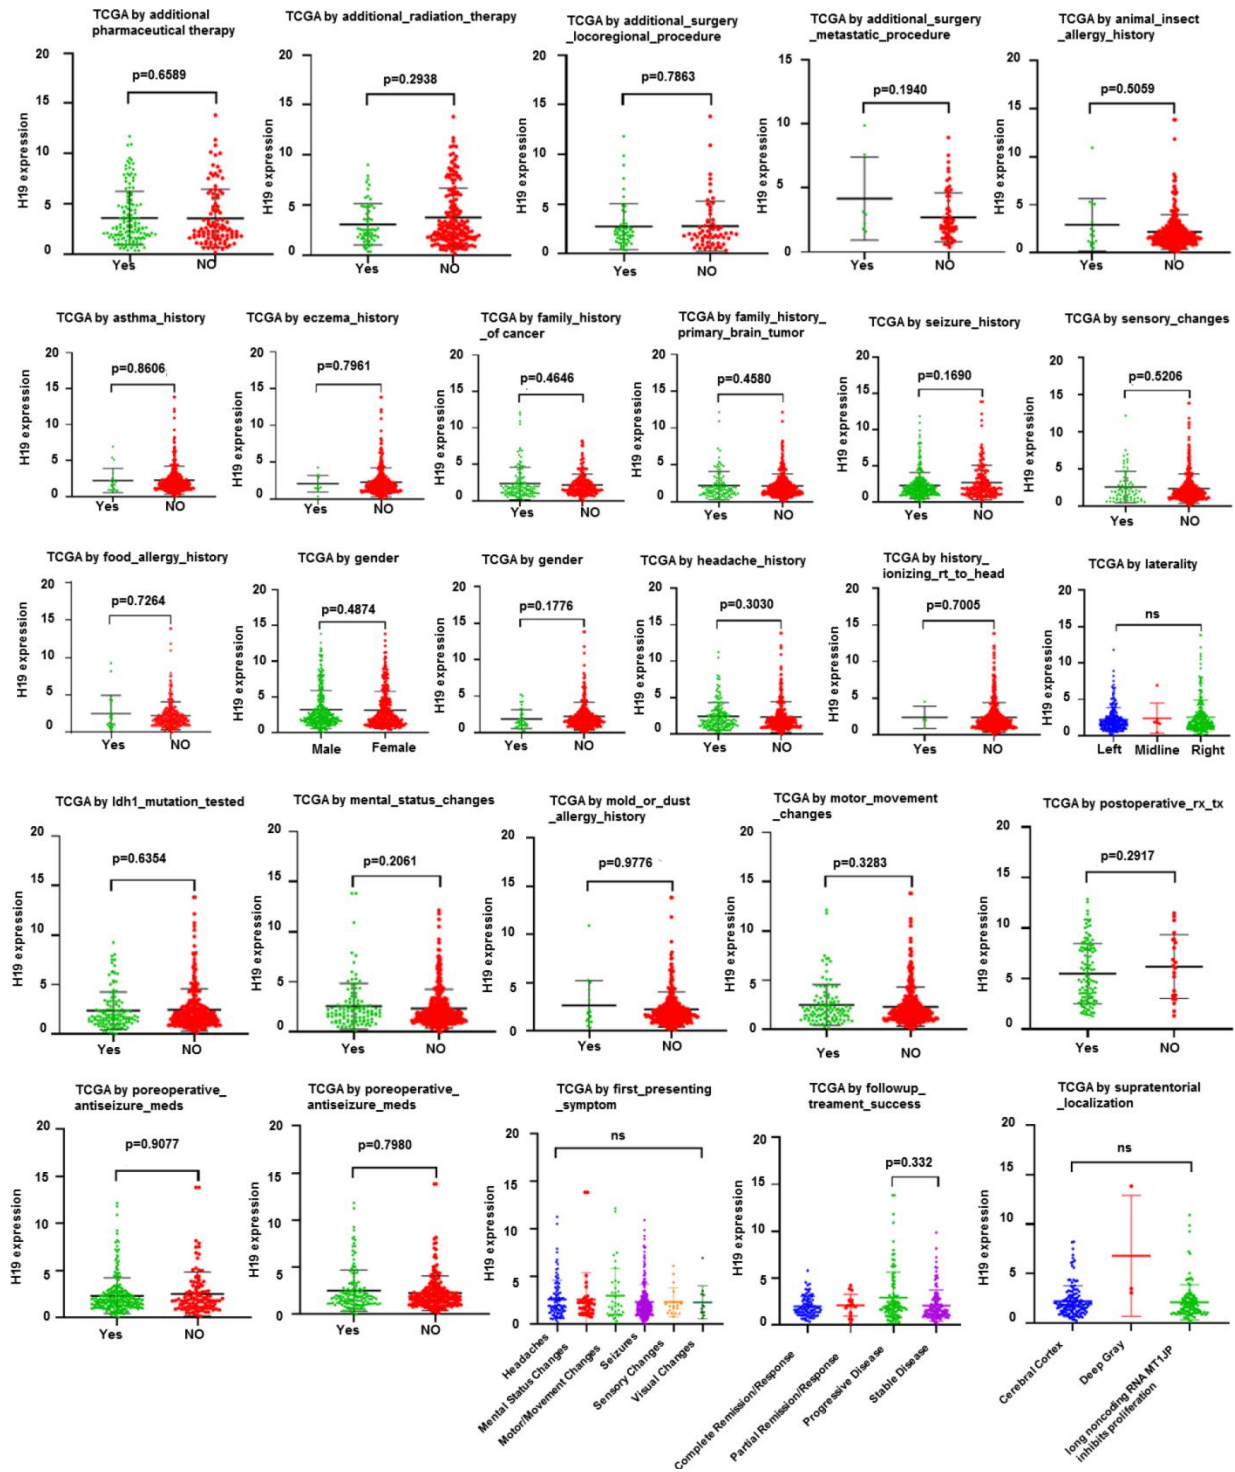

Supplementary Figure 1. No significant correlation between H19 expression and clinical traits.

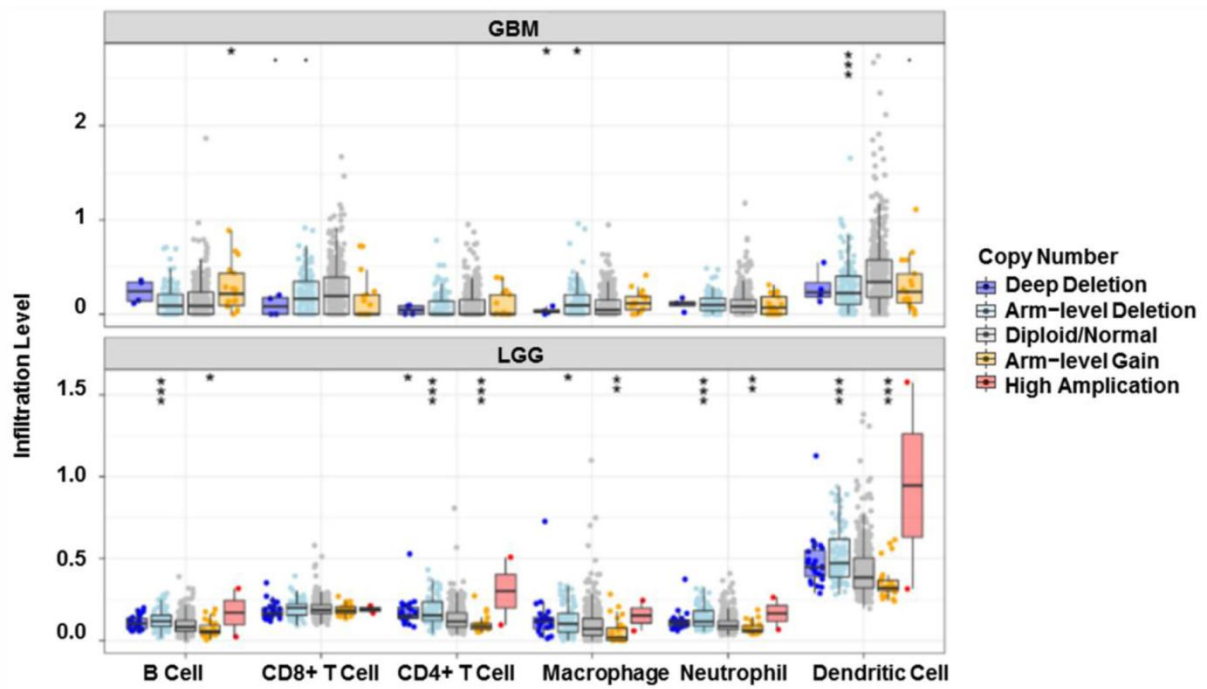

**Supplementary Figure 2. The relation between H19 copy number variation and infiltration level.** \*,  $P < 0.05$ ; \*\*,  $P < 0.01$ ; \*\*\*,  $P < 0.001$ . Abbreviation: LGG, low grade glioma; GBM, glioblastoma.

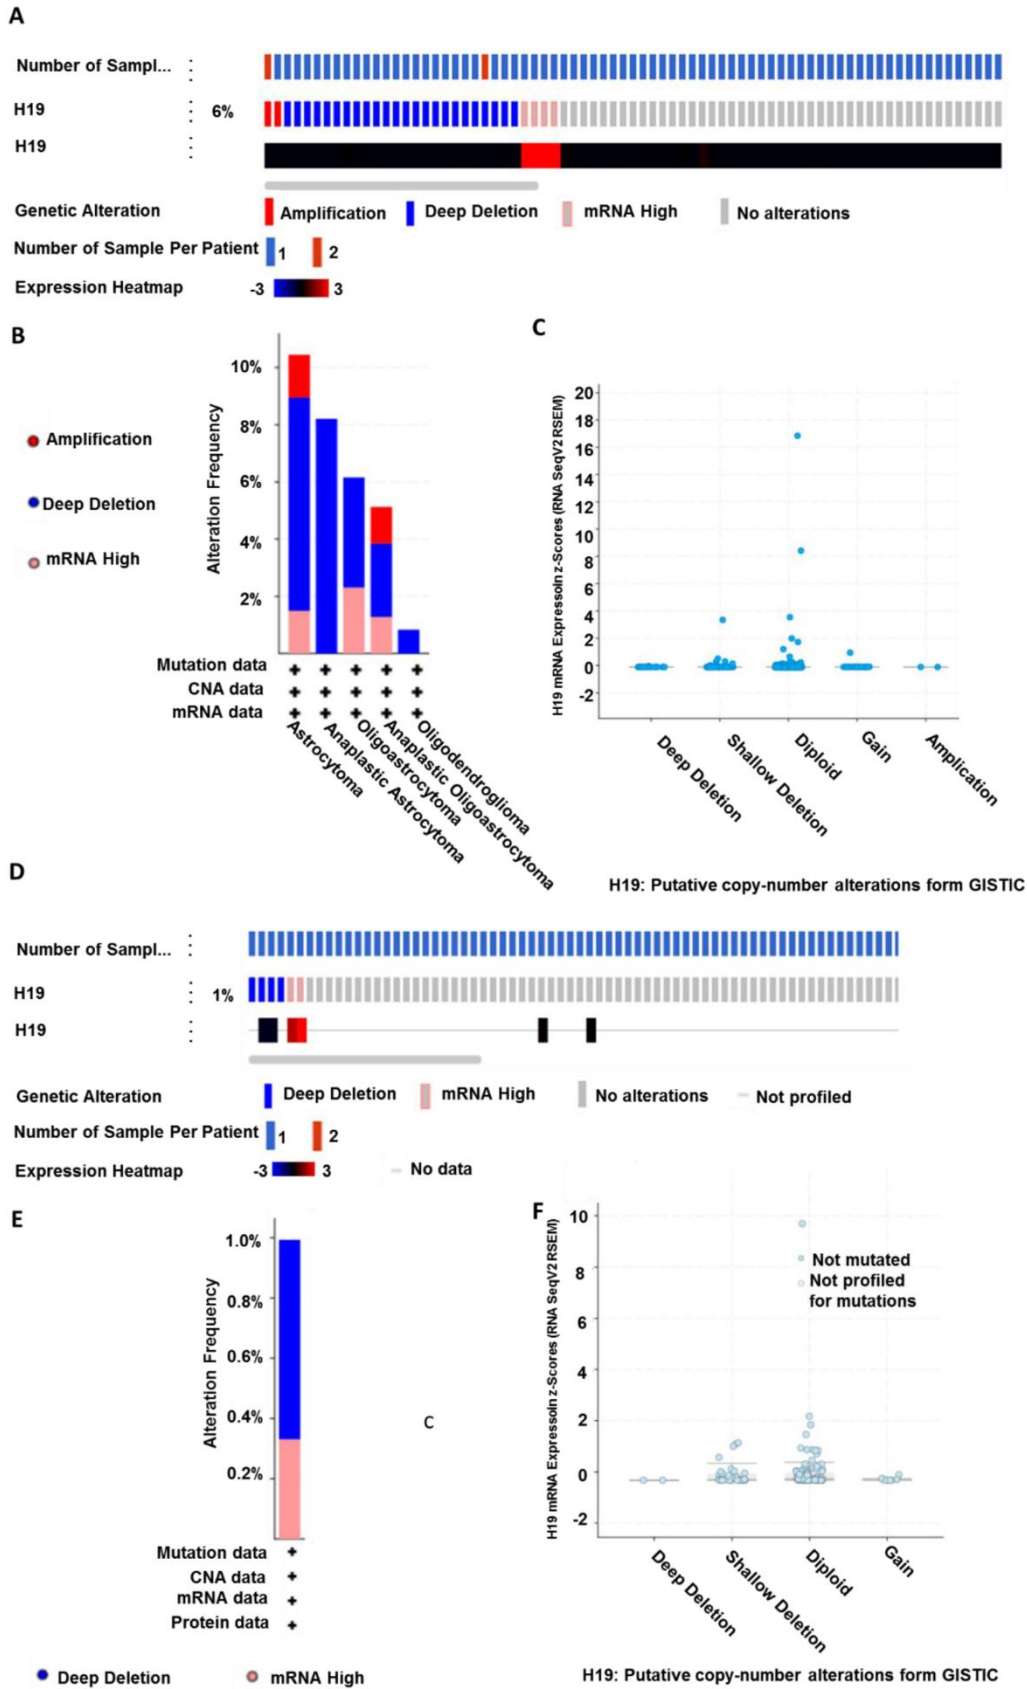

**Supplementary Figure 3. The relationship between the copy number of H19 and the mRNA level of H19.** The copy number of H19 did not affect the mRNA level of H19.
